# Supplementary material
Source: ML conference proceedings conference paper supplement (https://proceedings.neurips.cc/paper_files/paper/2021/hash/5d44a2b0d85aa1a4dd3f218be6422c66-Abstract.html)
Supplement: Supplementary file 1 [file 5d44a2b0d85aa1a4dd3f218be6422c66-Supplemental.zip]

Archive with 86 entries (81 files):
- fedrecon_appendix.pdf
- __MACOSX/._fedrecon_appendix.pdf
- reconstruction/
- __MACOSX/._reconstruction
- reconstruction/.DS_Store
- __MACOSX/reconstruction/._.DS_Store
- reconstruction/evaluation_computation.py
- __MACOSX/reconstruction/._evaluation_computation.py
- reconstruction/requirements.txt
- __MACOSX/reconstruction/._requirements.txt
- reconstruction/__init__.py
- __MACOSX/reconstruction/.___init__.py
- reconstruction/evaluation_computation_test.py
- __MACOSX/reconstruction/._evaluation_computation_test.py
- reconstruction/shared/
- __MACOSX/reconstruction/._shared
- reconstruction/README.md
- __MACOSX/reconstruction/._README.md
- reconstruction/training_process_test.py
- __MACOSX/reconstruction/._training_process_test.py
- reconstruction/stackoverflow/
- __MACOSX/reconstruction/._stackoverflow
- reconstruction/reconstruction_utils_test.py
- __MACOSX/reconstruction/._reconstruction_utils_test.py
- reconstruction/reconstruction_utils.py
- __MACOSX/reconstruction/._reconstruction_utils.py
- reconstruction/reconstruction_model.py
- __MACOSX/reconstruction/._reconstruction_model.py
- reconstruction/BUILD
- __MACOSX/reconstruction/._BUILD
- reconstruction/keras_utils_test.py
- __MACOSX/reconstruction/._keras_utils_test.py
- reconstruction/training_process.py
- __MACOSX/reconstruction/._training_process.py
- reconstruction/keras_utils.py
- __MACOSX/reconstruction/._keras_utils.py
- reconstruction/movielens/
- __MACOSX/reconstruction/._movielens
- reconstruction/shared/federated_trainer_utils.py
- __MACOSX/reconstruction/shared/._federated_trainer_utils.py
- reconstruction/shared/federated_evaluation.py
- __MACOSX/reconstruction/shared/._federated_evaluation.py
- reconstruction/shared/federated_evaluation_test.py
- __MACOSX/reconstruction/shared/._federated_evaluation_test.py
- reconstruction/shared/federated_trainer.py
- __MACOSX/reconstruction/shared/._federated_trainer.py
- reconstruction/shared/federated_tasks_test.py
- __MACOSX/reconstruction/shared/._federated_tasks_test.py
- reconstruction/shared/federated_trainer_utils_test.py
- __MACOSX/reconstruction/shared/._federated_trainer_utils_test.py
- reconstruction/shared/BUILD
- __MACOSX/reconstruction/shared/._BUILD
- reconstruction/stackoverflow/stackoverflow_dataset.py
- __MACOSX/reconstruction/stackoverflow/._stackoverflow_dataset.py
- reconstruction/stackoverflow/models_test.py
- __MACOSX/reconstruction/stackoverflow/._models_test.py
- reconstruction/stackoverflow/models.py
- __MACOSX/reconstruction/stackoverflow/._models.py
- reconstruction/stackoverflow/stackoverflow_dataset_test.py
- __MACOSX/reconstruction/stackoverflow/._stackoverflow_dataset_test.py
- reconstruction/stackoverflow/federated_stackoverflow.py
- __MACOSX/reconstruction/stackoverflow/._federated_stackoverflow.py
- reconstruction/stackoverflow/BUILD
- __MACOSX/reconstruction/stackoverflow/._BUILD
- reconstruction/movielens/movielens_dataset_test.py
- __MACOSX/reconstruction/movielens/._movielens_dataset_test.py
- reconstruction/movielens/testdata/
- __MACOSX/reconstruction/movielens/._testdata
- reconstruction/movielens/models_test.py
- __MACOSX/reconstruction/movielens/._models_test.py
- reconstruction/movielens/models.py
- __MACOSX/reconstruction/movielens/._models.py
- reconstruction/movielens/BUILD
- __MACOSX/reconstruction/movielens/._BUILD
- reconstruction/movielens/federated_movielens.py
- __MACOSX/reconstruction/movielens/._federated_movielens.py
- reconstruction/movielens/movielens_dataset.py
- __MACOSX/reconstruction/movielens/._movielens_dataset.py
- reconstruction/movielens/testdata/movies.dat
- __MACOSX/reconstruction/movielens/testdata/._movies.dat
- reconstruction/movielens/testdata/ratings.dat
- __MACOSX/reconstruction/movielens/testdata/._ratings.dat
- reconstruction/movielens/testdata/users.dat
- __MACOSX/reconstruction/movielens/testdata/._users.dat
- reconstruction/movielens/testdata/BUILD
- __MACOSX/reconstruction/movielens/testdata/._BUILD
