# Supplementary material
Source: ML conference proceedings conference paper supplement (https://proceedings.neurips.cc/paper_files/paper/2021/hash/5d44a2b0d85aa1a4dd3f218be6422c66-Abstract.html)
Supplement: Supplementary file 1 [file 5d44a2b0d85aa1a4dd3f218be6422c66-Supplemental.zip › reconstruction/__init__.py]

# Copyright 2020, Anonymous.
#
# Licensed under the Apache License, Version 2.0 (the "License");
# you may not use this file except in compliance with the License.
# You may obtain a copy of the License at
#
#      http://www.apache.org/licenses/LICENSE-2.0
#
# Unless required by applicable law or agreed to in writing, software
# distributed under the License is distributed on an "AS IS" BASIS,
# WITHOUT WARRANTIES OR CONDITIONS OF ANY KIND, either express or implied.
# See the License for the specific language governing permissions and
# limitations under the License.
"""Libraries for using Federated Reconstruction algorithms."""

from reconstruction.evaluation_computation import build_federated_reconstruction_evaluation
from reconstruction.evaluation_computation import build_federated_reconstruction_evaluation_process
from reconstruction.keras_utils import from_keras_model
from reconstruction.reconstruction_model import BatchOutput
from reconstruction.reconstruction_model import ReconstructionModel
from reconstruction.reconstruction_utils import build_dataset_split_fn
from reconstruction.reconstruction_utils import DatasetSplitFn
from reconstruction.reconstruction_utils import get_global_variables
from reconstruction.reconstruction_utils import get_local_variables
from reconstruction.reconstruction_utils import simple_dataset_split_fn
from reconstruction.training_process import build_federated_reconstruction_process
