# Supplementary material
Source: ML conference proceedings conference paper supplement (https://proceedings.neurips.cc/paper_files/paper/2021/hash/5d44a2b0d85aa1a4dd3f218be6422c66-Abstract.html)
Supplement: Supplementary file 1 [file 5d44a2b0d85aa1a4dd3f218be6422c66-Supplemental.zip › reconstruction/movielens/testdata/BUILD]

# Test data for MovieLens matrix factorization. Has the same format as the MovieLens 1M dataset.
# Permalink: https://grouplens.org/datasets/movielens/1m/

licenses(["notice"])

package(default_visibility = ["//visibility:public"])

filegroup(
    name = "movielens_small",
    srcs = glob(["*.dat"]),
)
