# Supplementary material
Source: ML conference proceedings conference paper supplement (https://proceedings.neurips.cc/paper_files/paper/2021/hash/5d44a2b0d85aa1a4dd3f218be6422c66-Abstract.html)
Supplement: Supplementary file 1 [file 5d44a2b0d85aa1a4dd3f218be6422c66-Supplemental.zip › reconstruction/movielens/testdata/ratings.dat]

1::1::5::978300760
2::4::3::978302109
5::5::3::978301968
1::2::4::978300275
3::4::5::978824291
1::2::3::978302268
1::3::5::978302039
4::6::5::978300719
5::3::4::978302268
5::6::4::978301368
1::7::5::978824268
6::8::4::978301752
1::8::4::978302281
7::3::4::978302124
8::2::5::978301753
1::8::4::978302188
2::5::3::978824268
2::7::4::978301777
3::4::5::978301713
4::7::4::978302039
