# Supplementary material
Source: ML conference proceedings conference paper supplement (https://proceedings.neurips.cc/paper_files/paper/2021/hash/5d44a2b0d85aa1a4dd3f218be6422c66-Abstract.html)
Supplement: Supplementary file 1 [file 5d44a2b0d85aa1a4dd3f218be6422c66-Supplemental.zip › reconstruction/README.md]

# Federated Reconstruction Models

This directory contains code for partially local federated learning with
reconstruction, as introduced in
"Federated Reconstruction: Partially Local Federated Learning".
The library includes general-purpose utilities for partially local federated
learning as well as experimental code for the paper.

## Using this Directory

This library uses [TensorFlow Federated](https://www.tensorflow.org/federated).
For a more general look at using TensorFlow Federated for research, see
[Using TFF for Federated Learning Research](https://www.tensorflow.org/federated/tff_for_research).

Some pip packages are required by this library and may need to be installed by
running `pip install -r requirements.txt`. Code has been tested with Python 3.8.

We also require [Bazel](https://www.bazel.build/) in order to run the code.
Please see the guide
[here](https://docs.bazel.build/versions/master/install.html) for installation
instructions.

## Directory Structure

The base directory `reconstruction/` contains general-purpose libraries for
partially local federated learning in TensorFlow Federated. `shared/` contains
utilities for running experiments shared across tasks. `movielens/` and
`stackoverflow/` each contain task-specific utilities for loading data,
preparing models, and running training loops.

## Running Experiments

`shared/federated_trainer.py` is the main binary for running experiments–it
accepts many flags for configuring experiments, e.g. for choosing different
tasks or hyperparameter tuning. These flags are documented in that file.

An example command for running a MovieLens experiment with `FedRecon` with
baseline hyperparameters:

```bash
bazel run shared:federated_trainer -- --task=movielens_mf --root_output_dir=/tmp/output --experiment_name=ml_mf --client_optimizer=sgd --client_learning_rate=0.5 \
--server_optimizer=sgd --server_learning_rate=1.0 --reconstruction_optimizer=sgd --reconstruction_learning_rate=0.1 --client_batch_size=5 --clients_per_round=100 \
--total_rounds=500 --rounds_per_eval=5 --rounds_per_checkpoint=25 --recon_epochs_max=5 --recon_steps_max=50 --post_recon_steps_max=50 --split_dataset=True
```

An example command for running a Stack Overflow experiment with `FedRecon` with
baseline hyperparameters:

```bash
bazel run shared:federated_trainer -- --task=stackoverflow_nwp --root_output_dir=/tmp/output --experiment_name=so_nwp --client_optimizer=sgd --client_learning_rate=0.3 \
--server_optimizer=yogi --server_learning_rate=0.1 --server_yogi_initial_accumulator_value=0.0 --server_yogi_beta2=0.99 --server_yogi_epsilon=0.001 --reconstruction_optimizer=sgd \
--reconstruction_learning_rate=0.1 --client_batch_size=16 --clients_per_round=200 --total_rounds=2500 --rounds_per_eval=10 --rounds_per_checkpoint=50 --so_nwp_max_elements_per_user=1024 \
--so_nwp_num_oov_buckets=500 --recon_epochs_max=5 --recon_steps_max=100 --post_recon_steps_max=100 --split_dataset=True
```

Be sure to use a different experiment name for each experiment.

## Extending the Library

### Adding New Tasks and Datasets

`movielens/federated_movielens.py` and
`stackoverflow/federated_stackoverflow.py` provide examples on setting up tasks
in this codebase. Each has a `run_federated` function which is called by
`shared/federated_trainer.py`. This function loads the model and data and builds
training and evaluation processes to run over a training loop. Additional tasks
and datasets can use the same pattern, modifying `shared/federated_trainer.py`
to call `run_federated` for any new tasks with task-specific flags.

### Evaluating New Algorithms

Each `run_federated` function for each task is passed builders for
reconstruction training and evaluation processes, but e.g. other
`tff.templates.IterativeProcess`s can be used for training instead (see
`training_process.py` for the federated reconstruction training process
implementation, which can be extended). See `shared/federated_trainer.py` for an
example of using a different evaluation computation for `Finetuning`. The
existing flags in `shared/federated_trainer.py` can be set to instantiate a
wider variety of algorithms even without code changes; for example, we can
perform `FederatedAveraging` by setting `jointly_train_variables=True,
split_dataset=False, global_variables_only=True,
reconstruction_learning_rate=0.0`.
