# Supplementary material
Source: ML conference proceedings conference paper supplement (https://proceedings.neurips.cc/paper_files/paper/2021/hash/5d44a2b0d85aa1a4dd3f218be6422c66-Abstract.html)
Supplement: Supplementary file 1 [file 5d44a2b0d85aa1a4dd3f218be6422c66-Supplemental.zip › reconstruction/reconstruction_utils.py]

# Copyright 2020, Anonymous.
#
# Licensed under the Apache License, Version 2.0 (the "License");
# you may not use this file except in compliance with the License.
# You may obtain a copy of the License at
#
#      http://www.apache.org/licenses/LICENSE-2.0
#
# Unless required by applicable law or agreed to in writing, software
# distributed under the License is distributed on an "AS IS" BASIS,
# WITHOUT WARRANTIES OR CONDITIONS OF ANY KIND, either express or implied.
# See the License for the specific language governing permissions and
# limitations under the License.
"""Shared utils for Federated Reconstruction training and evaluation."""

from typing import Callable, Iterable, Optional, Tuple

import attr
import tensorflow as tf
import tensorflow_federated as tff

from reconstruction import reconstruction_model

# Type alias for a function that takes in a TF dataset and tf.int64 round number
# and produces two TF datasets. The first is iterated over during reconstruction
# and the second is iterated over post-reconstruction, for both training and
# evaluation. This can be useful for e.g. splitting the dataset into disjoint
# halves for each stage, doing multiple local epochs of reconstruction/training,
# skipping reconstruction entirely, etc. See `build_dataset_split_fn` for
# a builder, although users can also specify their own `DatasetSplitFn`s (see
# `simple_dataset_split_fn` for an example).
DatasetSplitFn = Callable[[tf.data.Dataset, tf.Tensor], Tuple[tf.data.Dataset,
                                                              tf.data.Dataset]]


def simple_dataset_split_fn(
    client_dataset: tf.data.Dataset,
    round_num: tf.Tensor) -> Tuple[tf.data.Dataset, tf.data.Dataset]:
  """An example of a `DatasetSplitFn` that returns the original client data.

  Both the reconstruction data and post-reconstruction data will result from
  iterating over the same tf.data.Dataset. Note that depending on any
  preprocessing steps applied to client tf.data.Datasets, this may not produce
  exactly the same data in the same order for both reconstruction and
  post-reconstruction. For example, if
  `client_dataset.shuffle(reshuffle_each_iteration=True)` was applied,
  post-reconstruction data will be in a different order than reconstruction
  data.

  Args:
    client_dataset: `tf.data.Dataset` representing client data.
    round_num: Scalar tf.int64 tensor representing the 1-indexed round number
      during training. During evaluation, this is 0.

  Returns:
    A tuple of two `tf.data.Datasets`, the first to be used for reconstruction,
    the second to be used post-reconstruction.
  """
  del round_num
  return client_dataset, client_dataset


def build_dataset_split_fn(recon_epochs_max: int = 1,
                           recon_epochs_constant: bool = True,
                           recon_steps_max: Optional[int] = None,
                           post_recon_epochs: int = 1,
                           post_recon_steps_max: Optional[int] = None,
                           split_dataset: bool = False) -> DatasetSplitFn:
  """Builds a `DatasetSplitFn` for Federated Reconstruction training/evaluation.

  Returned `DatasetSplitFn` parameterizes training and evaluation computations
  and enables reconstruction for multiple local epochs (potentially as a
  function of the server round number), multiple epochs of post-reconstruction
  training, limiting the number of steps for both stages, and splitting client
  datasets into disjoint halves for each stage.

  Note that the returned function is used during both training and evaluation:
  during training, "post-reconstruction" refers to training of global variables
  (possibly jointly with local variables), and during evaluation, it refers to
  calculation of metrics using reconstructed local variables and fixed global
  variables.

  Args:
    recon_epochs_max: The integer maximum number of iterations over the dataset
      to make during reconstruction.
    recon_epochs_constant: If True, use `recon_epochs_max` as the constant
      number of iterations to make during reconstruction. If False, the number
      of iterations is min(round_num, recon_epochs_max).
    recon_steps_max: If not None, the integer maximum number of steps (batches)
      to iterate through during reconstruction. This maximum number of steps is
      across all reconstruction iterations, i.e. it is applied after
      `recon_epochs_max` and `recon_epochs_constant`. If None, this has no
      effect.
    post_recon_epochs: The integer constant number of iterations to make over
      client data after reconstruction.
    post_recon_steps_max: If not None, the integer maximum number of steps
      (batches) to iterate through after reconstruction. This maximum number of
      steps is across all reconstruction iterations, i.e. it is applied after
      `recon_epochs_max` and `recon_epochs_constant`. If None, this has no
      effect.
    split_dataset: If True, splits `client_dataset` in half for each user, using
      even-indexed entries in reconstruction and odd-indexed entries after
      reconstruction. If False, `client_dataset` is used for both reconstruction
      and post-reconstruction, with the above arguments applied. If True,
      splitting requires that mupltiple iterations through the dataset yield the
      same ordering. For example if
      `client_dataset.shuffle(reshuffle_each_iteration=True)` has been called,
      then the split datasets may have overlap. If True, note that the dataset
      should have more than one batch for reasonable results, since the
      splitting does not occur within batches.

  Returns:
    A `SplitDatasetFn`.
  """
  # Functions for splitting dataset if needed.
  recon_condition = lambda i, entry: tf.equal(tf.math.floormod(i, 2), 0)
  post_recon_condition = lambda i, entry: tf.greater(tf.math.floormod(i, 2), 0)
  get_entry = lambda i, entry: entry

  @tf.function
  def dataset_split_fn(
      client_dataset: tf.data.Dataset,
      round_num: tf.Tensor) -> Tuple[tf.data.Dataset, tf.data.Dataset]:
    """A `DatasetSplitFn` built with the given arguments.

    Args:
      client_dataset: `tf.data.Dataset` representing client data.
      round_num: Scalar tf.int64 tensor representing the 1-indexed round number
        during training. During evaluation, this is 0.

    Returns:
      A tuple of two `tf.data.Datasets`, the first to be used for
      reconstruction, the second to be used post-reconstruction.
    """
    # Split dataset if needed. This assumes the dataset has a consistent
    # order across iterations.
    if split_dataset:
      recon_dataset = client_dataset.enumerate().filter(recon_condition).map(
          get_entry)
      post_recon_dataset = client_dataset.enumerate().filter(
          post_recon_condition).map(get_entry)
    else:
      recon_dataset = client_dataset
      post_recon_dataset = client_dataset

    # Number of reconstruction epochs is exactly recon_epochs_max if
    # recon_epochs_constant is True, and min(round_num, recon_epochs_max) if
    # not.
    num_recon_epochs = recon_epochs_max
    if not recon_epochs_constant:
      num_recon_epochs = tf.math.minimum(round_num, recon_epochs_max)

    # Apply `num_recon_epochs` before limiting to a maximum number of batches
    # if needed.
    recon_dataset = recon_dataset.repeat(num_recon_epochs)
    if recon_steps_max is not None:
      recon_dataset = recon_dataset.take(recon_steps_max)

    # Do the same for post-reconstruction.
    post_recon_dataset = post_recon_dataset.repeat(post_recon_epochs)
    if post_recon_steps_max is not None:
      post_recon_dataset = post_recon_dataset.take(post_recon_steps_max)

    return recon_dataset, post_recon_dataset

  return dataset_split_fn


def get_global_variables(
    model: reconstruction_model.ReconstructionModel
) -> tff.learning.ModelWeights:
  """Gets global variables from a `ReconstructionModel` as `ModelWeights`."""
  return tff.learning.ModelWeights(
      trainable=model.global_trainable_variables,
      non_trainable=model.global_non_trainable_variables)


def get_local_variables(
    model: reconstruction_model.ReconstructionModel
) -> tff.learning.ModelWeights:
  """Gets local variables from a `ReconstructionModel` as `ModelWeights`."""
  return tff.learning.ModelWeights(
      trainable=model.local_trainable_variables,
      non_trainable=model.local_non_trainable_variables)


def has_only_global_variables(
    model: reconstruction_model.ReconstructionModel) -> bool:
  """Returns `True` if the model has no local variables."""
  local_variables_list = (
      list(model.local_trainable_variables) +
      list(model.local_non_trainable_variables))
  if local_variables_list:
    return False
  return True


@attr.s(eq=False, frozen=True)
class ServerState(object):
  """Structure for state on the server during training.

  Fields:
  -   `model`: A `tff.learning.ModelWeights` structure of the model's global
      variables, both trainable and non_trainable.
  -   `optimizer_state`: Variables of the server optimizer.
  -   `round_num`: The integer training round number, 1-indexed.
  """
  model = attr.ib()
  optimizer_state = attr.ib()
  round_num = attr.ib()
  aggregator_state = attr.ib()


@attr.s(eq=False, frozen=True)
class ClientOutput(object):
  """Structure for outputs returned from clients during training.

  Fields:
  -   `weights_delta`: A dictionary of updates to the model's global trainable
      variables.
  -   `client_weight`: Weight to be used in a weighted mean when aggregating
      `weights_delta`.
  -   `model_output`: A structure reflecting the losses and metrics produced
      during training on the input dataset.
  """
  weights_delta = attr.ib()
  client_weight = attr.ib()
  model_output = attr.ib()


def create_optimizer_vars(
    model: reconstruction_model.ReconstructionModel,
    optimizer: tf.keras.optimizers.Optimizer) -> Iterable[tf.Variable]:
  """Applies a placeholder update to optimizer to enable getting its variables."""
  delta = tf.nest.map_structure(tf.zeros_like,
                                get_global_variables(model).trainable)
  grads_and_vars = tf.nest.map_structure(
      lambda x, v: (-1.0 * x, v), tf.nest.flatten(delta),
      tf.nest.flatten(get_global_variables(model).trainable))
  optimizer.apply_gradients(grads_and_vars, name='server_update')
  return optimizer.variables()
