# Supplementary material
Source: ML conference proceedings conference paper supplement (https://proceedings.neurips.cc/paper_files/paper/2021/hash/5d44a2b0d85aa1a4dd3f218be6422c66-Abstract.html)
Supplement: Supplementary file 1 [file 5d44a2b0d85aa1a4dd3f218be6422c66-Supplemental.zip › reconstruction/requirements.txt]

absl-py==0.11.0
attr==0.3.1
numpy==1.19.5
pandas==1.2.2
requests==2.25.1
tensorflow==2.4.1
tensorflow-federated==0.18.0
tensorflow-privacy==0.5.1
