# Supplementary material
Source: ML conference proceedings conference paper supplement (https://proceedings.neurips.cc/paper_files/paper/2021/hash/5d44a2b0d85aa1a4dd3f218be6422c66-Abstract.html)
Supplement: Supplementary file 1 [file 5d44a2b0d85aa1a4dd3f218be6422c66-Supplemental.zip › reconstruction/stackoverflow/models.py]

# Copyright 2020, Anonymous.
#
# Licensed under the Apache License, Version 2.0 (the "License");
# you may not use this file except in compliance with the License.
# You may obtain a copy of the License at
#
#      http://www.apache.org/licenses/LICENSE-2.0
#
# Unless required by applicable law or agreed to in writing, software
# distributed under the License is distributed on an "AS IS" BASIS,
# WITHOUT WARRANTIES OR CONDITIONS OF ANY KIND, either express or implied.
# See the License for the specific language governing permissions and
# limitations under the License.
"""Stackoverflow reconstruction models."""
import collections
import tensorflow as tf

from reconstruction import keras_utils
from reconstruction import reconstruction_model


class GlobalEmbedding(tf.keras.layers.Layer):
  """A custom Keras Embedding layer used for the global embeddings.

  The `GlobalEmbedding`s correspond to embeddings with input dimension size
  vocabulary_size + 3 (pad/bos/eos). The updates to these embeddings are sent
  to the server.
  """

  def __init__(
      self,
      total_vocab_size: int,
      embedding_dim: int,
      mask_zero: bool = True,
      initializer: tf.keras.initializers = tf.keras.initializers.random_uniform,
      **kwargs):
    super(GlobalEmbedding, self).__init__(**kwargs)
    self.total_vocab_size = total_vocab_size
    self.embedding_dim = embedding_dim
    self.mask_zero = mask_zero
    self.initializer = initializer

  def build(self, input_shape):
    self.embeddings = self.add_weight(
        shape=(self.total_vocab_size, self.embedding_dim),
        initializer=self.initializer,
        name='global_embedding',
    )

  def call(self, inputs):
    embedding_inputs = tf.where(inputs < self.total_vocab_size, inputs,
                                tf.zeros_like(input=inputs))
    embeddings = tf.nn.embedding_lookup(self.embeddings, embedding_inputs)
    return tf.where(
        tf.expand_dims(inputs < self.total_vocab_size, axis=-1), embeddings,
        tf.zeros_like(input=embeddings))

  def compute_mask(self, inputs, mask=None):
    if not self.mask_zero:
      return None
    return tf.not_equal(inputs, 0)


class LocalEmbedding(tf.keras.layers.Layer):
  """A custom Keras Embedding layer used for the local embeddings.

  The `LocalEmbedding`s correspond to embeddings of input size
  number of out of vocabulary buckets.
  These embeddings are reconstructed locally at the beginning of every round,
  and their updates never leave the device.
  """

  def __init__(
      self,
      input_dim: int,
      embedding_dim: int,
      total_vocab_size: int,
      mask_zero: bool = True,
      initializer: tf.keras.initializers = tf.keras.initializers.random_uniform,
      **kwargs):
    super(LocalEmbedding, self).__init__(**kwargs)
    self.input_dim = input_dim
    self.embedding_dim = embedding_dim
    self.mask_zero = mask_zero
    self.total_vocab_size = total_vocab_size
    self.initializer = initializer

  def build(self, input_shape):
    self.embeddings = self.add_weight(
        shape=(self.input_dim, self.embedding_dim),
        initializer=self.initializer,
        name='local_embedding',
    )

  def call(self, inputs):
    embedding_inputs = tf.where(inputs >= self.total_vocab_size,
                                inputs - self.total_vocab_size,
                                tf.zeros_like(input=inputs))
    embeddings = tf.nn.embedding_lookup(self.embeddings, embedding_inputs)
    return tf.where(
        tf.expand_dims(inputs >= self.total_vocab_size, axis=-1), embeddings,
        tf.zeros_like(input=embeddings))

  def compute_mask(self, inputs, mask=None):
    if not self.mask_zero:
      return None
    return tf.not_equal(inputs, 0)


def create_recurrent_reconstruction_model(
    vocab_size: int = 10000,
    num_oov_buckets: int = 1,
    embedding_size: int = 96,
    latent_size: int = 670,
    num_layers: int = 1,
    input_spec=None,
    global_variables_only: bool = False,
    name: str = 'rnn_recon_embeddings',
) -> reconstruction_model.ReconstructionModel:
  """Creates a recurrent model with a partially reconstructed embedding layer.

  Constructs a recurrent model for next word prediction, with the embedding
  layer divided in two parts:
    - A global_embedding, which shares its parameter updates with the server.
    - A locally reconstructed local_embedding layer, reconstructed at the
      beginning of every round, that never leaves the device. This local
      embedding layer corresponds to the out of vocabulary buckets.

  Args:
    vocab_size: Size of vocabulary to use.
    num_oov_buckets: Number of out of vocabulary buckets.
    embedding_size: The size of the embedding.
    latent_size: The size of the recurrent state.
    num_layers: The number of layers.
    input_spec: A structure of `tf.TensorSpec`s specifying the type of arguments
      the model expects. Notice this must be a compound structure of two
      elements, specifying both the data fed into the model to generate
      predictions, as its first element, as well as the expected type of the
      ground truth as its second.
    global_variables_only: If True, the returned `ReconstructionModel` contains
      all model variables as global variables. This can be useful for
      baselines involving aggregating all variables.
    name: (Optional) string to name the returned `tf.keras.Model`.

  Returns:
    `ReconstructionModel` tracking global and local variables for a recurrent
    model.
  """

  if vocab_size < 0:
    raise ValueError('The vocab_size is expected to be greater than, or equal '
                     'to 0. Got {}'.format(vocab_size))

  if num_oov_buckets <= 0:
    raise ValueError('The number of out of vocabulary buckets is expected to '
                     'be greater than 0. Got {}'.format(num_oov_buckets))

  global_layers = []
  local_layers = []

  total_vocab_size = vocab_size + 3  # pad/bos/eos.
  extended_vocab_size = total_vocab_size + num_oov_buckets  # pad/bos/eos + oov.
  inputs = tf.keras.layers.Input(shape=(None,), dtype=tf.int64)

  global_embedding = GlobalEmbedding(
      total_vocab_size=total_vocab_size,
      embedding_dim=embedding_size,
      mask_zero=True,
      name='global_embedding_layer')
  global_layers.append(global_embedding)

  local_embedding = LocalEmbedding(
      input_dim=num_oov_buckets,
      embedding_dim=embedding_size,
      total_vocab_size=total_vocab_size,
      mask_zero=True,
      name='local_embedding_layer')
  local_layers.append(local_embedding)

  projected = tf.keras.layers.Add()(
      [global_embedding(inputs),
       local_embedding(inputs)])

  for i in range(num_layers):
    layer = tf.keras.layers.LSTM(
        latent_size, return_sequences=True, name='lstm_' + str(i))
    global_layers.append(layer)
    processed = layer(projected)
    # A projection changes dimension from rnn_layer_size to
    # input_embedding_size.
    projection = tf.keras.layers.Dense(
        embedding_size, name='projection_' + str(i))
    global_layers.append(projection)
    projected = projection(processed)

  # We predict the OOV tokens as part of the output vocabulary.
  last_layer = tf.keras.layers.Dense(
      extended_vocab_size, activation=None, name='last_layer')
  global_layers.append(last_layer)
  logits = last_layer(projected)

  model = tf.keras.Model(inputs=inputs, outputs=logits, name=name)

  if input_spec is None:
    input_spec = collections.OrderedDict(
        x=tf.TensorSpec(shape=(None,), dtype=tf.int64),
        y=tf.TensorSpec(shape=(None,), dtype=tf.int64))

  # Merge local layers into global layers if needed.
  if global_variables_only:
    global_layers.extend(local_layers)
    local_layers = []

  return keras_utils.from_keras_model(
      keras_model=model,
      global_layers=global_layers,
      local_layers=local_layers,
      input_spec=input_spec)
